# Supplementary material for: Inulin Can Alleviate Metabolism Disorders in ob/ob Mice by Partially Restoring Leptin-related Pathways Mediated by Gut Microbiota
Source: PubMed Central journal article supplement (PMC6520907; doi:10.1016/j.gpb.2019.03.001), 2019-04-23

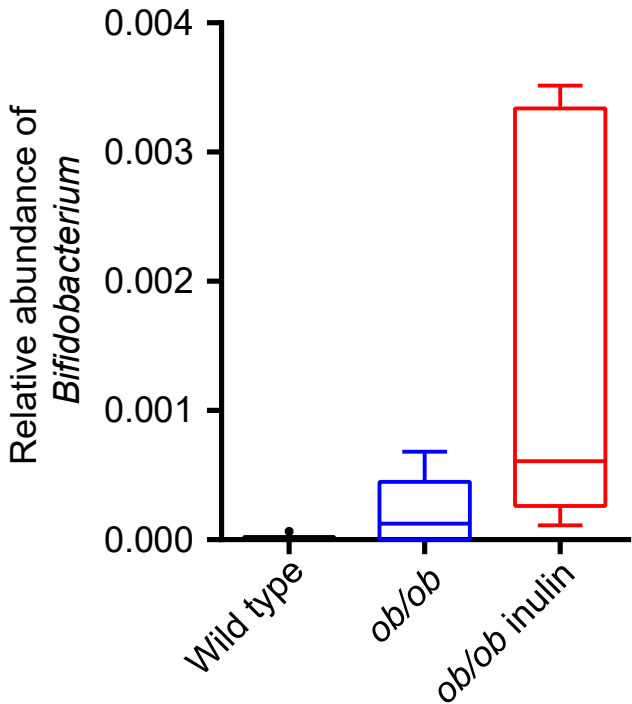

Supplement: mmc5.pdf [file mmc5.pdf]
